# Supplementary material for: Stable Patterns of Gene Expression Regulating Carbohydrate Metabolism Determined by Geographic Ancestry
Source: PLoS One. 2009 Dec 9;4(12):e8183. doi: 10.1371/journal.pone.0008183 (PMC2790609; doi:10.1371/journal.pone.0008183)
Supplement: Table S1 — Real-time qPCR reagents. Quadruplicate reactions from each subject's RNA sample were performed (N = 47 subjects; 17 self-identified African American, 30 self-identified Caucasian). RNA input was calibrated with 18S expression levels and relative mRNA levels were normalized to levels from the UHRR (Stratagene, LaJolla, CA). *Determined using ProbeFinder (version 2.44) and the Universal ProbeLibrary (Roche Applied Science, Indianapolis, IN). (1.39 MB XLS) [file pone.0008183.s002.xls]

## Sheet: Table S1
Table S1: Real-time qPCR reagents
Gene Symbol	Probe/primer set
POU2AF1	ABI Hs00174811_m1
SMAD1	ABI Hs00195432_m1
PSPH	ABI Hs00190154_m1
S100P	ABI Hs00195584_m1
MMP9	ABI Hs00234579_m1
PGM1	ABI Hs00160062_m1
HP	ABI Hs00978377_m1
PSPHL	ABI Hs00863464_m1
SREBF1*	Probe #77 (04689003001)
	left primer: 5’-CGCTCCTCCATCAATGACA-3’
	right primer: 5’-TGCGCAAGACAGCAGATTTA-3’
Quadruplicate reactions from each subject’s RNA sample were performed (N=47 subjects; 17 self-identified African American, 30 self-identified Caucasian). RNA input was calibrated with 18S expression levels and relative mRNA levels were normalized to levels from the UHRR (Stratagene, LaJolla, CA). *Determined using ProbeFinder (version 2.44) and the Universal ProbeLibrary (Roche Applied Science, I…
