# Supplementary material for: Stable Patterns of Gene Expression Regulating Carbohydrate Metabolism Determined by Geographic Ancestry
Source: PLoS One. 2009 Dec 9;4(12):e8183. doi: 10.1371/journal.pone.0008183 (PMC2790609; doi:10.1371/journal.pone.0008183)
Supplement: Table S3 — TRANSFAC enrichment analysis. For each predicted TRANSFAC binding site the actual and predicted number (shown in parentheses) are provided assuming an equal distribution between up- and down-regulated genes. * indicates distributions considered unequal at p<0.05, d = fold-enrichment in down-regulated genes. (1.39 MB XLS) [file pone.0008183.s004.xls]

## Sheet: Table S3
Table S3: TRANSFAC enrichment analysis
		V$AML_Q6	V$HNF3ALPHA_Q6	V$SREBP1_Q6	V$E2F1_Q6: E2F-1
up-regulated genes	48	3 (4)	26 (34)	6 (14)	29 (32)
down-regulated genes	103	9 (8)	81 (73)	37 (29)	71 (68)
fold-enrichment		1.4 d	1.5 d	*2.9 d	1.2 d
p value		0.613572	0.0961883	0.0120216	0.549342
For each predicted TRANSFAC binding site the actual and predicted number (shown in parenthesis) are provided assuming an equal distribution between up- and down-regulated genes. * indicates distributions considered unequal at p < 0.05, d = fold-enrichment in down-regulated genes.
