# Supplementary material for: Stable Patterns of Gene Expression Regulating Carbohydrate Metabolism Determined by Geographic Ancestry
Source: PLoS One. 2009 Dec 9;4(12):e8183. doi: 10.1371/journal.pone.0008183 (PMC2790609; doi:10.1371/journal.pone.0008183)
Supplement: Table S4 — eQTL false discovery rates (FDR) in geo-ancestral genes. (1.39 MB XLS) [file pone.0008183.s005.xls]

## Sheet: Table S4
Table S4: eQTL false discovery rates (FDR) in geo-ancestral genes
p value threshold	Genotype Model			Additive Model
	Actual	Expected	FDR	Actual	Expected	FDR
0.01	73	60	0.451128	106	65	0.380117
0.00794328	67	44	0.396396	91	56	0.380952
0.00630957	62	38	0.38	77	52	0.403101
0.00501187	47	33	0.4125	65	41	0.386792
0.00398107	44	27	0.380282	53	32	0.376471
0.00316228	41	22	0.349206	47	25	0.347222
0.00251189	39	19	0.327586	42	24	0.363636
0.00199526	38	15	0.283019	40	20	0.333333
0.00158489	35	14	0.285714	38	19	0.333333
0.00125893	34	10	0.227273	35	16	0.313725
0.001	28	9	0.243243	29	15	0.340909
0.000794328	24	6	0.2	25	12	0.324324
0.000630957	24	5	0.172414	24	8	0.25
0.000501187	22	5	0.185185	20	6	0.230769
0.000398107	20	4	0.166667	18	5	0.217391
0.000316228	19	3	0.136364	16	4	0.2
0.000251189	18	3	0.142857	16	3	0.157895
0.000199526	16	1	0.0588235	14	3	0.176471
0.000158489	13	1	0.0714286	13	2	0.133333
0.000125893	13	1	0.0714286	13	2	0.133333
0.0001	12	0	0	11	1	0.0833333
7.94328e-05	9	0	0	11	1	0.0833333
6.30957e-05	7	0	0	10	0	0
5.01187e-05	7	0	0	9	0	0
3.98107e-05	7	0	0	9	0	0
3.16228e-05	6	0	0	8	0	0
2.51189e-05	5	0	0	7	0	0
1.99526e-05	5	0	0	7	0	0
1.58489e-05	5	0	0	4	0	0
1.25893e-05	4	0	0	4	0	0
1e-05	3	0	0	3	0	0
